# Supplementary material for: A Topographical Atlas of Shiga Toxin 2e Receptor Distribution in the Tissues of Weaned Piglets
Source: PubMed Central journal article supplement (PMC5198551; doi:10.3390/toxins8120357), 2016-11-30
Supplement: toxins-08-00357-s001.pdf [file toxins-08-00357-s001.pdf]

# Supplementary Materials: A Topographical Atlas of Shiga Toxin 2e Receptor Distribution in the Tissues of Weaned Piglets

Daniel Steil, Robert Bonse, Iris Meisen, Gottfried Pohlentz, German Vallejo, Helge Karch and Johannes Müthing

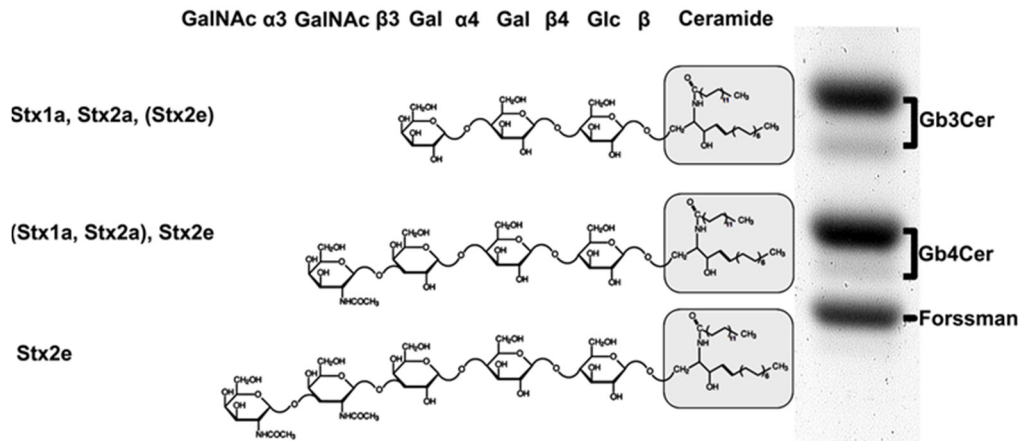

**Figure S1.** Stx receptors Gb3Cer, Gb4Cer and Forssman GSL. Structures of Gb3Cer, Gb4Cer and Forssman GSL (middle panel, from top to bottom) together with indications of preferential receptor recognition of Stx1a, Stx2a and Stx2e (left panel) and orcinol-stained thin-layer chromatogram of a GSL reference mixture containing the three receptor GSLs (right panel). Stx-subtypes in parentheses indicate less binding potential of respective Stx.

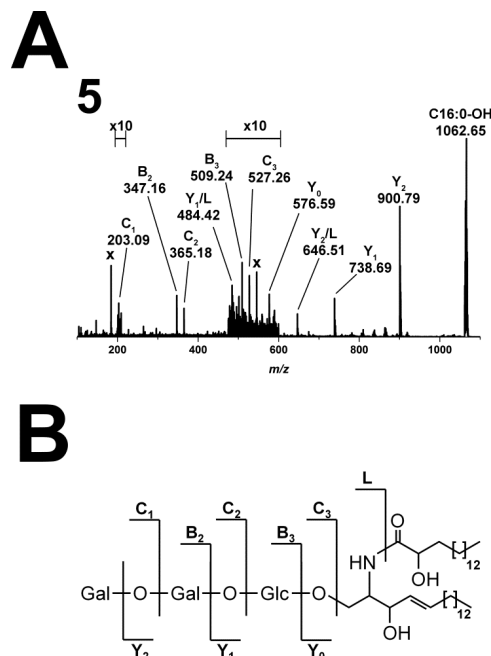

**Figure S2.** MS<sup>2</sup> spectrum of Gb3Cer (d18:1, C16:0-OH) from male duodenum (A) and corresponding fragmentation scheme (B). (A) Ions marked with an 'x' are not further characterized compounds; '5' corresponds to sample number 5 (intestine duodenum, see Table 1 and Table S1); (B) The fragment acronyms explain the fragment ions obtained by CID mass spectrometry from precursor ions at  $m/z$  1062.65.

**Table S1.** Synopsis of tissue/organ wet weights and ranks of Gb3Cer and Gb4Cer content of samples from male and female weaned piglet.

| No. <sup>a</sup> | Tissue/Organ             | Wet Weight (mg) |        | Rank Gb3Cer |        | Rank Gb4Cer |        |
|------------------|--------------------------|-----------------|--------|-------------|--------|-------------|--------|
|                  |                          | Male            | Female | Male        | Female | Male        | Female |
| 1                | earlobe                  | 189.5           | 511.1  | 24          | 16     | 8           | 18     |
| 2                | eyelid                   | 240.5           | 262.6  | 16          | 17     | 15          | 15     |
| 3                | nasal bridge             | 80.8            | 302.3  | 11          | 21     | 7           | 19     |
| 4                | quadriceps muscle        | 314.8           | 804.9  | 15          | 24     | 12          | 22     |
| 5                | intestine duodenum       | 449.1           | 450.9  | 3           | 6      | 16          | 11     |
| 6                | intestine jejunum        | 141.7           | 375.7  | 1           | 7      | 17          | 13     |
| 7                | intestine ileum          | 234.3           | 378.5  | 4           | 4      | 6           | 9      |
| 8                | ureter                   | 118.5           | 140.8  | 12          | 15     | 10          | 14     |
| 9                | stomach                  | 424.7           | 364    | 17          | 12     | 9           | 3      |
| 10               | spleen                   | 173.5           | 352.6  | 6           | 2      | 1           | 1      |
| 11               | pancreas                 | 248.3           | 871.1  | 18          | 19     | 5           | 8      |
| 12               | liver                    | 501.6           | 627.4  | 14          | 10     | 22          | 10     |
| 13               | gall bladder             | 101.4           | 234.5  | 19          | 20     | 18          | 6      |
| 14               | lung                     | 279.2           | 464.1  | 2           | 1      | 3           | 2      |
| 15               | lymph nodes <sup>b</sup> | 108.3           | 588.2  | 7           | 5      | 13          | 7      |
| 16               | intestine colon          | 223.4           | 564.1  | 5           | 3      | 14          | 16     |
| 17               | kidney cortex            | 162.1           | 473.4  | 23          | 14     | 21          | 21     |
| 18               | kidney medulla           | 36.4            | 57.4   | 13          | 18     | 19          | 20     |
| 19               | kidney pelvis            | 123.2           | 149.1  | 8           | 8      | 2           | 5      |
| 20               | urinary bladder          | 261.5           | 320.7  | 9           | 9      | 20          | 17     |
| 21               | heart                    | 412.4           | 617.9  | 10          | 11     | 11          | 12     |
| 22               | cerebrum                 | 612.7           | 768    | 22          | 22     | 25          | 25     |
| 23               | cerebellum               | 308             | 928    | 21          | 23     | 24          | 23     |
| 24               | whole blood              | 961.3           | 615.1  | 20          | 13     | 4           | 4      |
| 25               | serum <sup>c</sup>       | 500             | 500    | 25          | 25     | 23          | 24     |

<sup>a</sup> Corresponding to identical sample numbering in Figures 1 and 4 (male piglet) and Figures 8 and 9 (female piglet) as well as in Table 1; <sup>b</sup> From small intestine; <sup>c</sup> Volume in microliter ( $\mu\text{L}$ ).

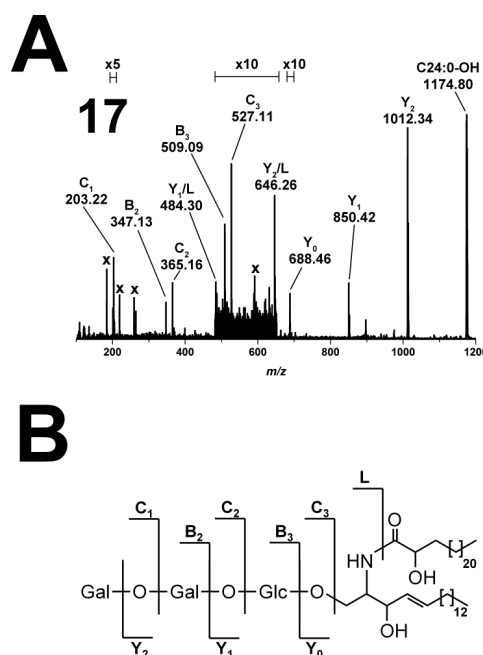

**Figure S3.** MS<sup>2</sup> spectrum of Gb3Cer (d18:1, C24:0-OH) from male cortex (A) and corresponding fragmentation scheme (B). (A) Ions marked with an 'x' are not further characterized compounds; '17' corresponds to sample number 17 (kidney cortex, see Table 1 and Table S1); (B) The fragment acronyms explain the fragment ions obtained by CID mass spectrometry from precursor ions at  $m/z$  1174.80.

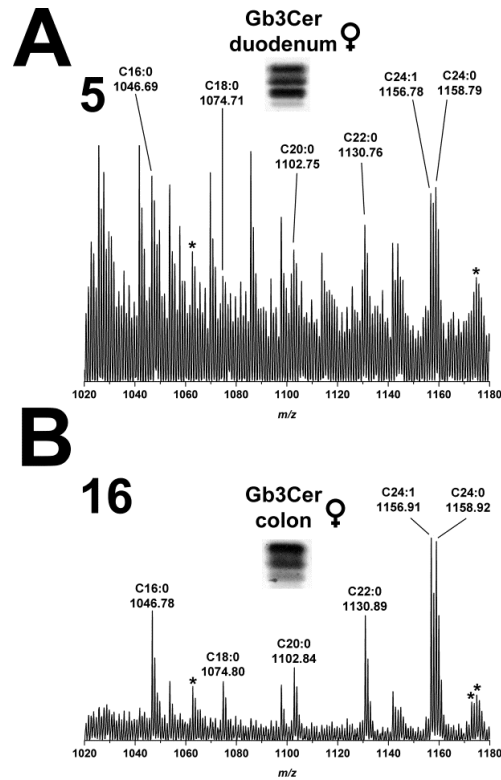

**Figure S4.** Overview mass spectra of Gb3Cer lipofoms derived from duodenum (**A**) and colon (**B**) of the female piglet. The MS<sup>1</sup> spectra display the *m/z* range between 1020 and 1180 comprising Gb3Cer lipofoms with variable fatty acid from C16:0 up to C24:1/C24:0 as assigned in the spectrum. All Gb3Cer variants carry constant sphingosine (d18:1) in their respective ceramide moiety. The asterisks point to mass shifts of 15.99 u indicating presence of an additional OH-group in the ceramide moiety, most likely linked to the fatty acyl chain, in comparison to non-hydroxylated species. That are Gb3Cer variants of the female duodenum ((**A**) sample no. 5, see Figure 1, Table 1 and Table S1) with C16:0-OH (*m/z* 1062.70) and C24:0-OH (*m/z* 1174.78). Identified hydroxylated Gb3Cer variants of the female colon ((**B**) sample 16, see Figure 1, Table 1 and Table S1) are lipofoms with C16:0-OH (*m/z* 1062.78) and C24:1-OH/C24:0-OH (*m/z* 1172.89/1174.87).

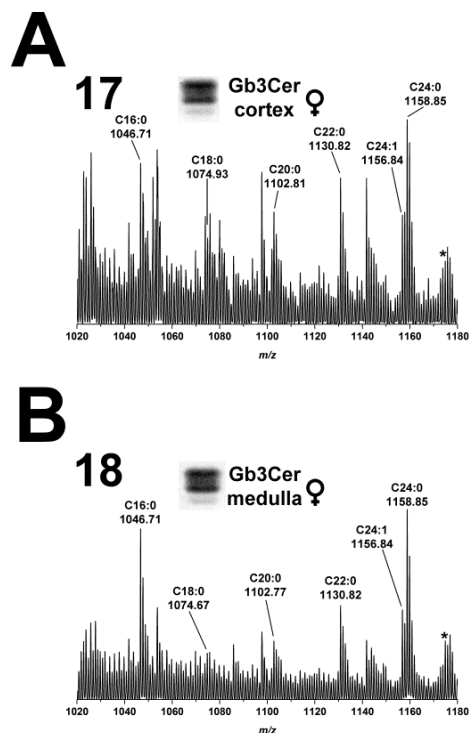

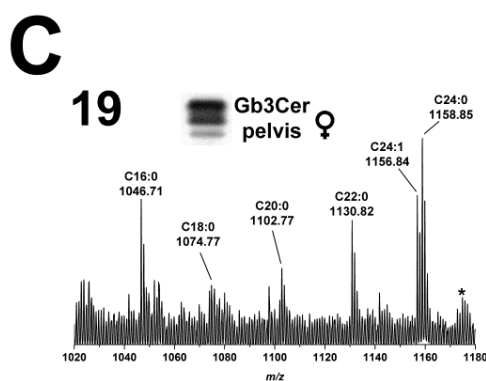

**Figure S5.** Overview mass spectra of Gb3Cer lipofoms derived from cortex (**A**); medulla (**B**) and pelvis (**C**) of the female piglet. The MS<sup>1</sup> spectra depict the *m/z* range from 1020 to 1180 encompassing Gb3Cer variants with variable fatty acid from C16:0 up to C24:1/C24:0 as marked in the spectrum. All Gb3Cer variants harbor constant sphingosine (d18:1) in their respective ceramide moiety. The asterisks indicate hydroxylation of the ceramide portion, most likely of the fatty acid, of Gb3Cer with C24:0-OH (*m/z* 1174.84) in the female cortex ((**A**) sample no. 17); female medulla ((**B**) sample no. 18), and female pelvis ((**C**) sample no. 19) (see Figure 1, Table 1, and Table S1).
